# Supplementary material for: Hierarchical NiO mesocrystals with tuneable high-energy facets for pseudocapacitive charge storage
Source: Royal Society of Chemistry journal article supplement (doi:10.1039/c7ta00978j), 2017-01-01
Supplement: c7ta00978j1.pdf [file c7ta00978j1.pdf]

## Electronic Supplementary Information (ESI)

### Hierarchical NiO Mesocrystals with Tuneable High-Energy Facets for Pseudocapacitive Charge Storage

*Mingtao Zheng,<sup>a,b,c,\*</sup> Hanwu Dong,<sup>a,b</sup> Yong Xiao,<sup>b</sup> Hang Hu,<sup>a</sup> Chenglong He,<sup>a</sup> Yeru Liang,<sup>a</sup> Bingfu Lei,<sup>a,b</sup>*

*Luyi Sun,<sup>c,\*</sup> and Yingliang Liu<sup>a,b,\*</sup>*

<sup>a</sup> Department of Materials Science and Engineering, College of Materials and Energy, South China Agricultural University, Guangzhou 510642, China

<sup>b</sup> Guangdong Provincial Engineering Technology Research Center for Optical Agriculture, Guangzhou 510642, China

<sup>c</sup> Department of Chemical & Biomolecular Engineering and Polymer Program, Institute of Materials Science, University of Connecticut, Storrs 06269, USA

## Experimental

**Materials.** Nickel acetate tetrahydrate [ $\text{Ni}(\text{COOCH}_3)_2 \cdot 4\text{H}_2\text{O}$ ,  $\text{Ni}(\text{Ac})_2$ ], carbon black, and polytetrafluoroethylene (PTFE) were purchased from Sigma-Aldrich. Absolute ethanol and potassium hydroxide (KOH) were purchased from Guangzhou Chemical Reagent Factory (China). All the chemical reagents were analytically pure and used as received without further purification.

**Synthesis of Hierarchically Structured NOMs.** The cuboctahedral NOMs were synthesized by a simple hydrothermal method without involving any expensive organic additives and post-treatment process. In a typical procedure, 4.0 g of  $\text{Ni}(\text{Ac})_2$  was magnetically stirred in 40 mL of ethanol solution with various volume ratio ( $V_{\text{ethanol}}/V_{\text{H}_2\text{O}}$ ) for 30 min to form a homogeneous solution, which was then sealed into a steel-stainless autoclave with 50 mL of capacity. Subsequently, the autoclave was placed in an electronic furnace, and then heated to 400 °C at a heating rate of 10 °C  $\text{min}^{-1}$  and maintained at this temperature for 12 h. After cooling down to room temperature naturally, the greyish-green powders were collected and washed with de-ionized water and ethanol for several times, and then dried at 60 °C overnight. The as-prepared samples were denoted as “NOM-x”, where x represents the volume of ethanol (mL).

**Characterization of NiO Mesostructures.** The samples were characterized by X-ray diffraction (XRD, MSAL-XD2, Cu  $K\alpha$ ,  $\lambda=0.15406$  nm). The morphology of the samples was characterized by field emission scanning electron microscopy (FESEM, Zeiss Ultra 55), transmission electron microscopy (TEM), and high resolution TEM (HRTEM, JEM-2100F). The porosity of the as-prepared NOMs was determined from  $\text{N}_2$  adsorption/desorption isotherms measured at 77 K using an automatic volumetric sorption analyzer (ASAP 2020 HD88, Micromeritics Instrument Corp.).

**Electrochemical Measurements.** The working electrode was prepared by pressing a mixture of active materials, carbon black, and 5% PTFE (75:15:10 wt %) into a current collector of a foam nickel electrode under 35 MPa. All electrochemical measurements were performed on an IviumStat electrochemical workstation at room temperature. The experiments were carried out in a standard three electrodes cell, a nickel foil as counter electrode, a saturated calomel electrode (SCE) as reference electrode, and the above mentioned electrode as working electrode. The working electrode was measured by cyclic voltammetry (CV), galvanostatic charge/discharge, and electrochemical impedance spectroscopy (EIS) in 2.0 M KOH aqueous solution.

Specific capacitance was calculated from the CV curves by using **Eq. 1**:

$$C = \frac{Q}{mV} = \frac{\int Idt}{m\Delta V} \quad (1)$$

where  $I$  is the oxidation or reduction current,  $dt$  is the time differential,  $m$  indicates the mass of the active electrode material, and  $\Delta V$  indicates the voltage range of one sweep segment. Specific capacitance could also be calculated from the galvanostatic charge and discharge curves by using **Eq. 2**:

$$C = \frac{I \times \Delta t}{m \times \Delta V} \quad (2)$$

where  $I$  is the charge or discharge current,  $\Delta t$  is the discharge time,  $m$  indicates the mass of the active material, and  $\Delta V$  represents the voltage change after a full charge or discharge. The hybrid supercapacitor was assembled by using NOM-20 and the three-dimensional nitrogen-doped graphene (3DNG), which was prepared as previously reported,<sup>S1</sup> as the positive and negative electrodes in 2.0 M KOH with one piece of cellulose paper as the separator. The mass ratio between the positive and negative electrodes was determined based on **Eq. 3**:<sup>S2</sup>

$$\frac{m_+}{m_-} = \frac{C_- \times V_-}{C_+ \times V_+} \quad (3)$$

where  $m$ ,  $C$ , and  $V$  correspond the mass of the active material, capacitance, and potential window of the electrode, respectively. The subscripts “+” and “-” represent the positive and negative electrode, respectively. According to the specific capacitances (334 F g<sup>-1</sup> for 3DNG and 1039 F g<sup>-1</sup> for NOM-20) and the potential windows for the 3DNG and NOM-20 electrodes, the optimal mass ratio can be calculated to be  $m_+/m_- = 0.64$  for the hybrid supercapacitor. The energy density and power density were calculated from **Eqs. 4** and **5**:

$$E = \frac{0.5 \times CV^2}{3.6} \quad (4)$$

$$P = \frac{3600 \times E}{t} \quad (5)$$

where  $E$  (Wh kg<sup>-1</sup>) and  $P$  (W kg<sup>-1</sup>) are the energy density and power density, respectively. The definitions of  $C$ ,  $V$ , and  $t$  are the same as those in **Eq. 2**, in which the specific capacitance ( $C$ ) of the hybrid supercapacitor was calculated based on the total mass of active material (including NOM-20 and 3DNG).

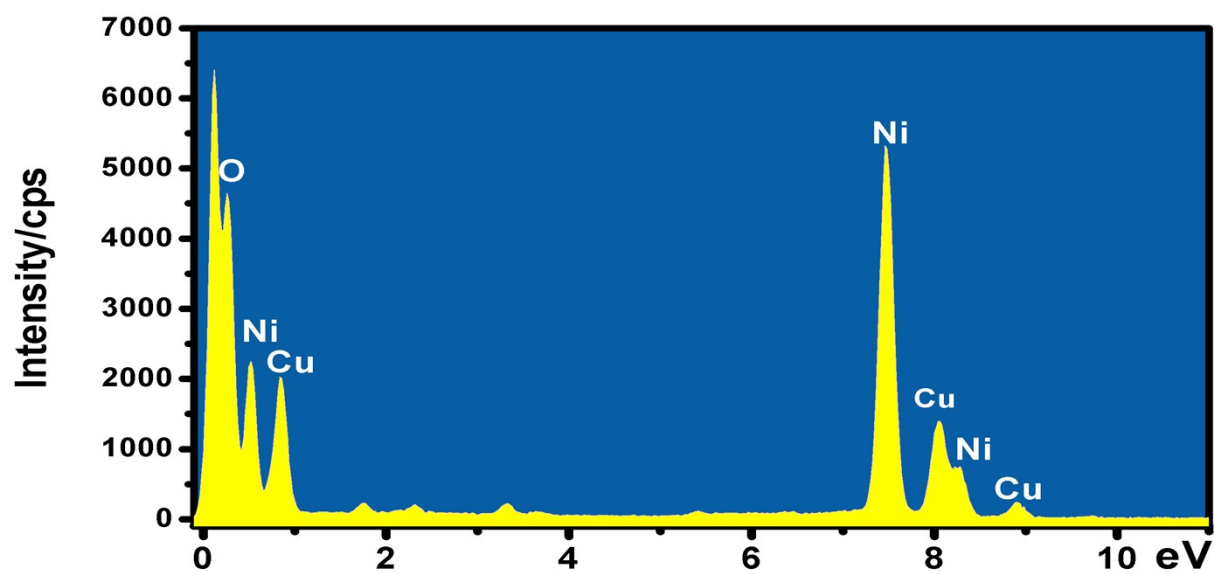

Fig. S1. EDX spectrum of the as-prepared NOM-20 at 400 °C for 12 h.

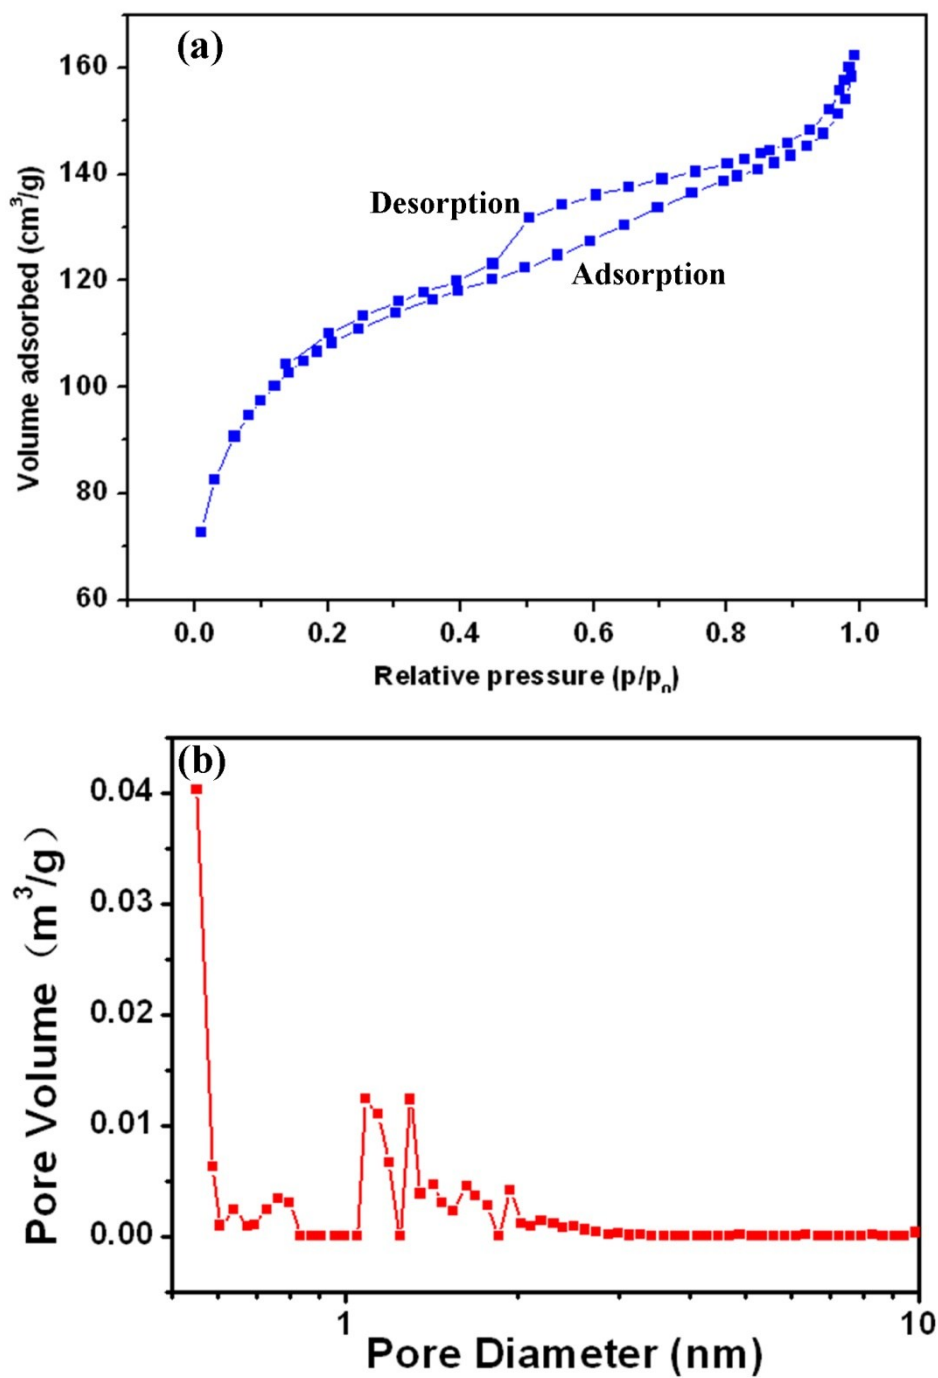

**Fig. S2.** (a)  $N_2$  adsorption-desorption isotherms and (b) pore diameter curve of the as-prepared NOM-20.

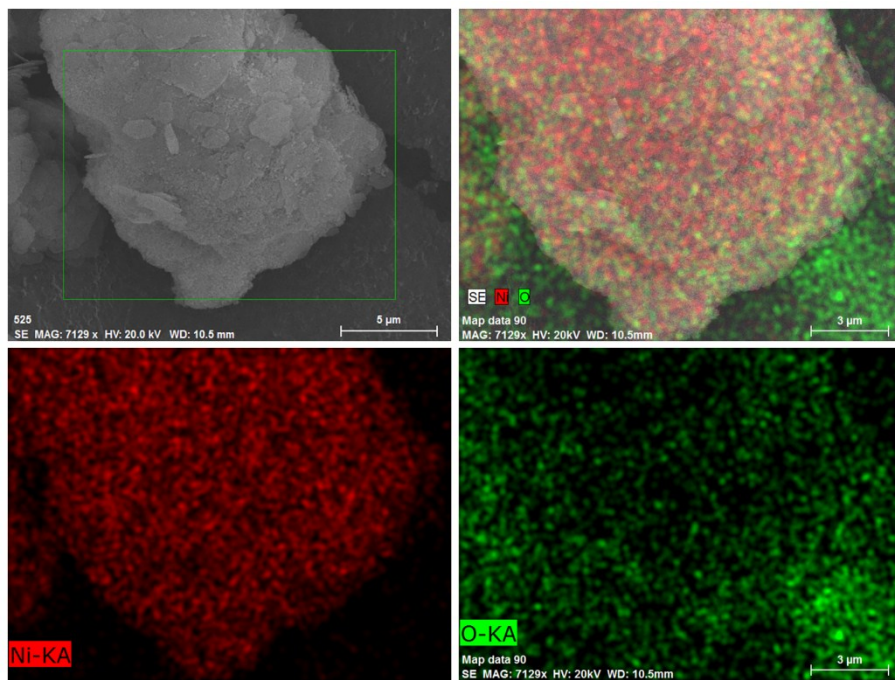

**Fig. S3.** Element mapping image of the as-obtained NiO aggregates.

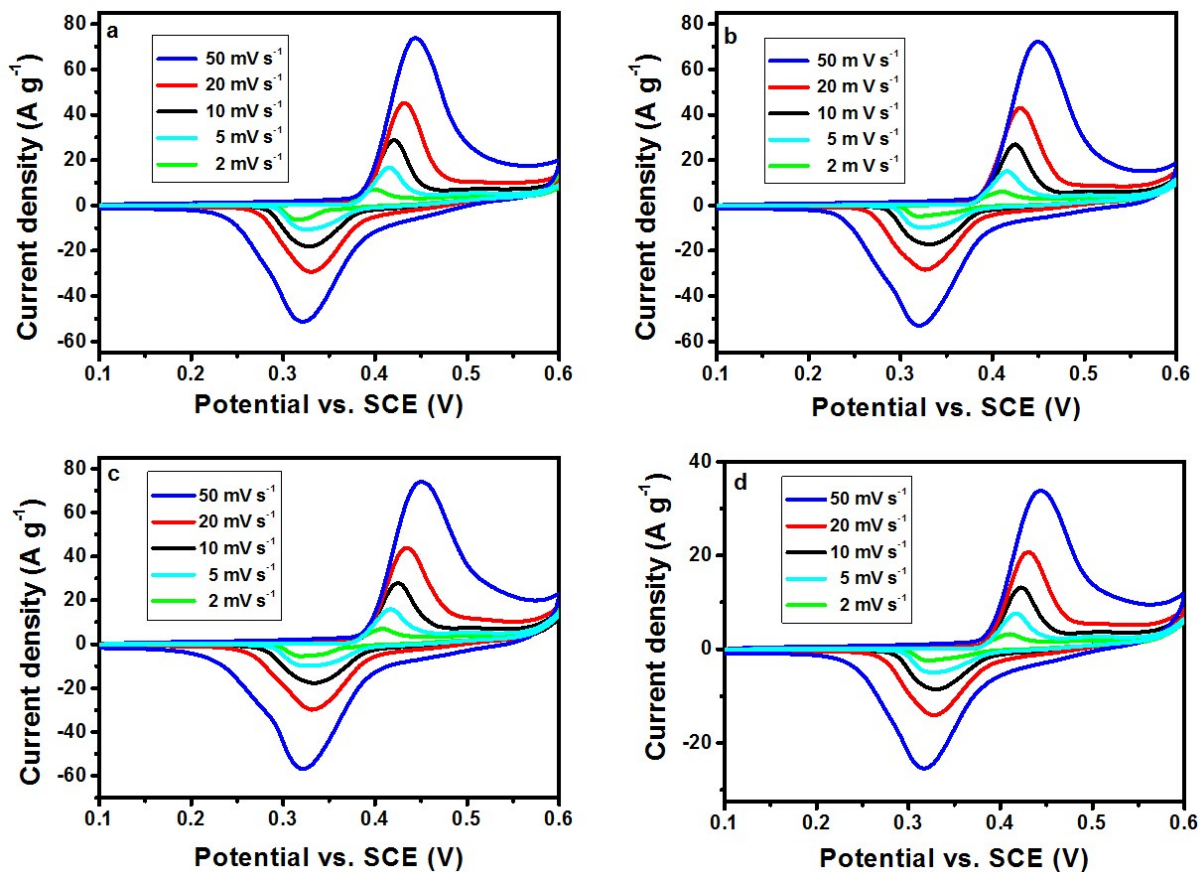

**Fig. S4.** CV curves of the as-prepared samples at various scan rates. (a) NONFs, (b) NOM-10, (c) NOM-30, and (d) NOM-40.

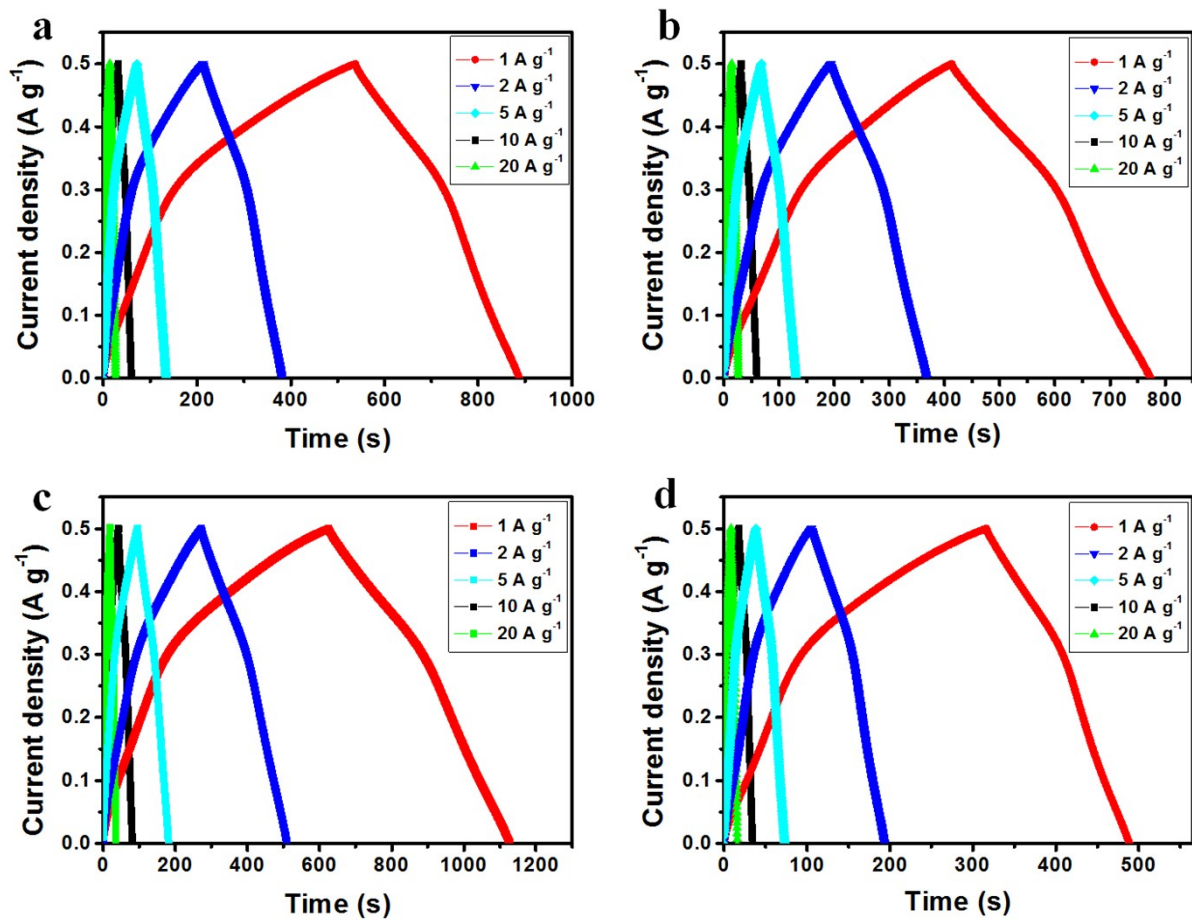

**Fig. S5.** GCD curves of the as-prepared samples at different current density ranging from 1.0 to 20  $\text{A g}^{-1}$ . (a) NONFs, (b) NOM-10, (c) NOM-30, and (d) NOM-40.



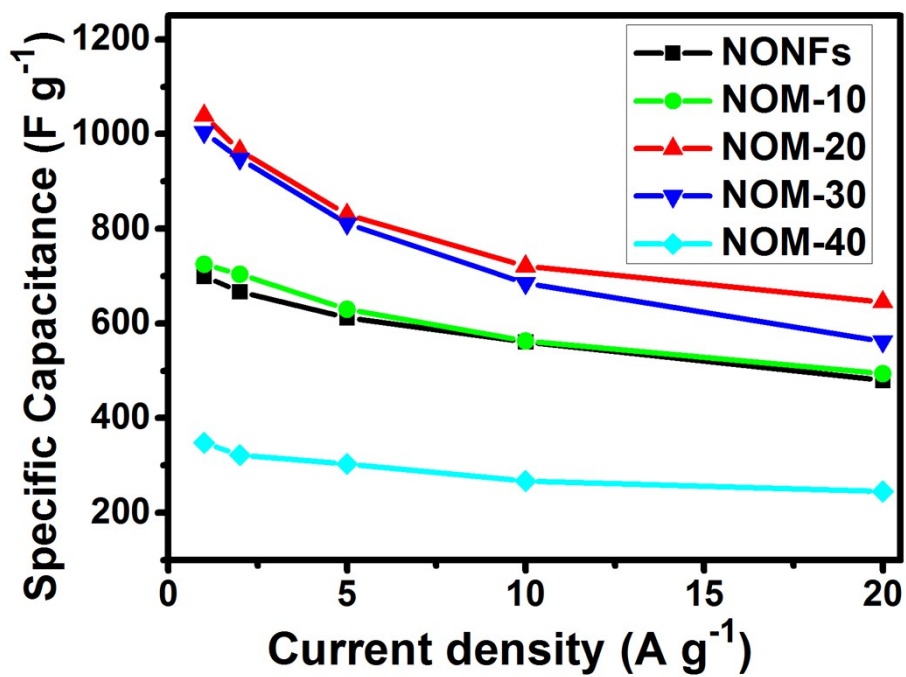

Fig. S6. Specific capacitance of the samples as a function of current density.

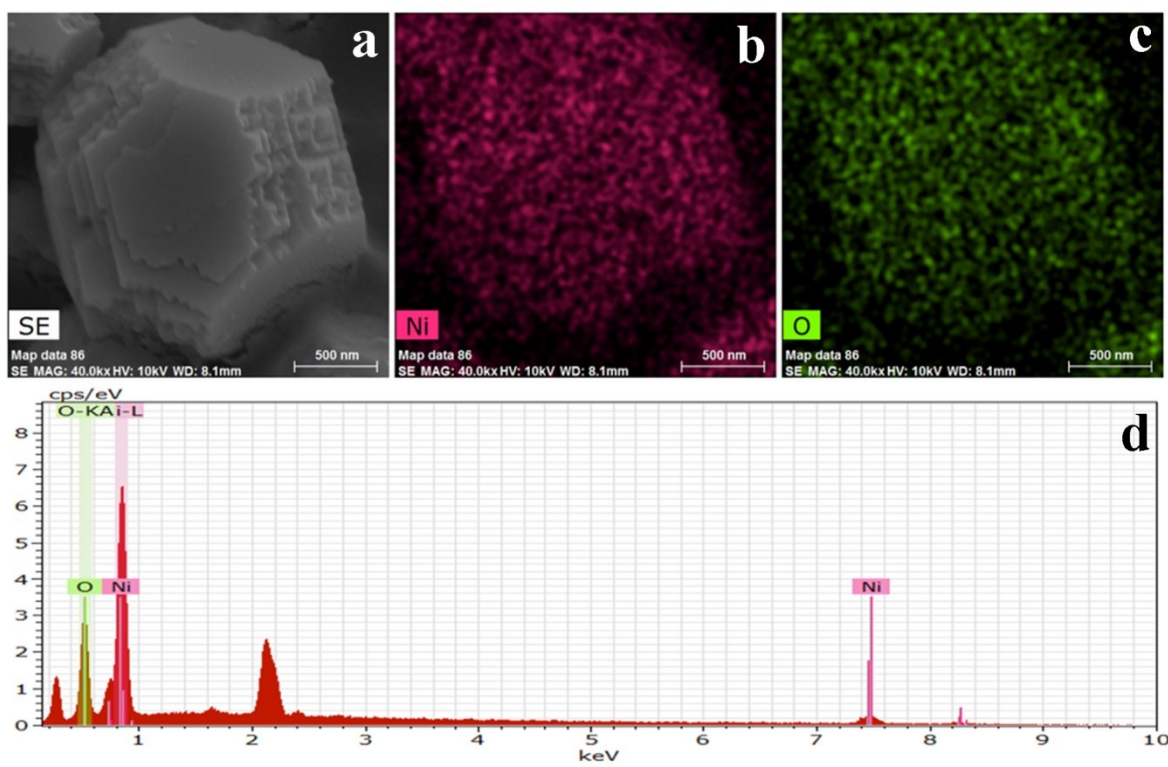

**Fig. S7.** FESEM image (a), corresponding element mapping images of Ni (b) and O (c), and EDS spectrum of the NOM-20 sample after 10,000 charge/discharge cycles.

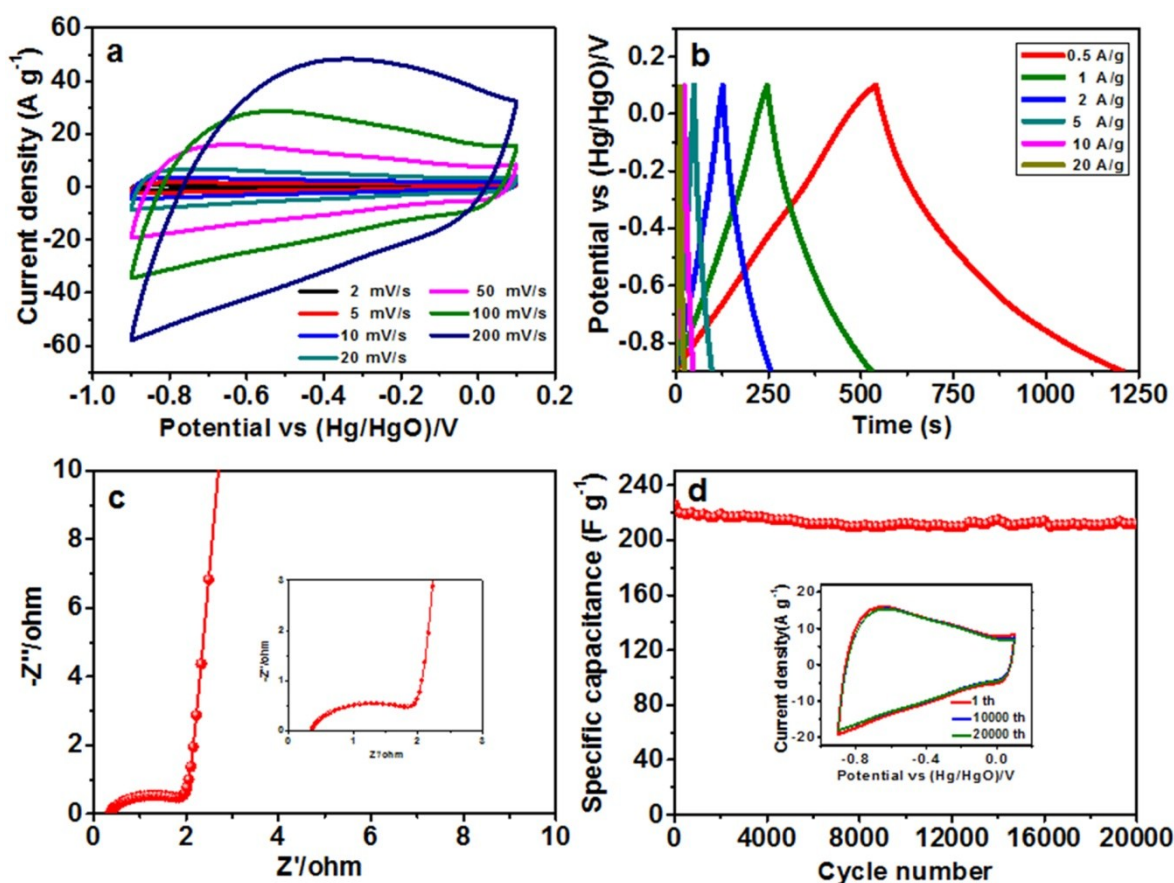

**Fig. S8.** Electrochemical performance of the employed 3DNG: (a) CV curves at various scan rates, (b) GCD curves at different current densities ranging from 0.5 to 20 A g<sup>-1</sup>, (c) Electrochemical impedance spectroscopy (EIS) of 3DNG electrode, and (d) the cycling stability performance at constant current density of 10 A g<sup>-1</sup>.

To explore the merits of 3DNG as negative electrode material for hybrid supercapacitors, the electrochemical performance for the employed 3DNG was tested in a three-electrode system with 2 M KOH aqueous solution as electrolyte. **Fig. S8a** depicts the CV curves of the employed 3DNG at different scan rates ranging from 2 to 200 mV s<sup>-1</sup>. The specific capacitance calculated from the CV curves of 3DNG is ca. 274 F g<sup>-1</sup> at a scan rate of 2 mV s<sup>-1</sup>, and still retains ca. 171 F g<sup>-1</sup> even at an ultrahigh scan rate of 200 mV s<sup>-1</sup>. **Fig. S8b** shows the GCD curves of the employed 3DNG at various current densities ranging from 0.5 to 20

A  $\text{g}^{-1}$ . The employed 3DNG exhibits an ultrahigh specific capacitance of ca.  $334 \text{ F g}^{-1}$  at a current density of  $0.5 \text{ A g}^{-1}$  from the slopes of the discharge curves. Especially, even at a very high current density of  $20 \text{ A g}^{-1}$ , the 3DNG still exhibits a high specific capacitance of ca.  $225 \text{ F g}^{-1}$ . **Fig. S8c** presents the characteristic impedance curve (Nyquist plots) for the 3DNG in the  $2 \text{ M KOH}$  electrolyte. The real axis intercept represents the combined resistance, including the ionic resistance of the electrolyte, electronic resistance of electrode materials, and contact resistance at the active material/current collector interface. As observed from the magnified image in the relatively high frequency region (Inset in **Fig. S8c**), the employed 3DNG shows a relatively low combined resistance of ca.  $0.38 \text{ ohm}$ , indicating a good electrical conductivity. The long-term cycling stability of the employed 3DNG was investigated using GCD at a high current density of  $10 \text{ A g}^{-1}$  (**Fig. S8d**). It can be clearly seen that the 3DNG presents an outstanding cycling stability and excellent capacitance retention of ca.  $93\%$  after  $20\,000$  charge/discharge cycles. These results suggest that the as-employed 3DNG exhibits excellent electrochemical performance including high specific capacitance, good conductivity, remarkable stability, and outstanding reversibility when used as electrode material for supercapacitors.

**Table S1.** Comparison of the electrochemical performance for NiO micro/nanostructures.

| Morphology                       |               | $S_{\text{BET}}$ ( $\text{m}^2 \text{g}^{-1}$ ) | Specific capacitance ( $\text{F g}^{-1}$ ) | Electrolyte      | Test conditions                         | Ref.             |
|----------------------------------|---------------|-------------------------------------------------|--------------------------------------------|------------------|-----------------------------------------|------------------|
| One-dimensional                  |               |                                                 |                                            |                  |                                         |                  |
| hierarchical                     | hollow        | 136.3                                           | 642                                        | 2.0 M KOH        | 3.0 A $\text{g}^{-1}$                   | S3               |
| nanostructures                   |               |                                                 |                                            |                  |                                         |                  |
| porous nanosheets                |               | 156                                             | 168                                        | 6.0 M KOH        | 1.0 A $\text{g}^{-1}$                   | S4               |
| Spongy spheres                   |               | 414                                             | 930                                        | 2.0 M KOH        | 15 A $\text{g}^{-1}$                    | S5               |
| Porous thin film                 |               | --                                              | 839                                        | 1.0 M KOH        | 1 A $\text{g}^{-1}$                     | S6               |
| Core-shell microspheres          |               | 196                                             | 448                                        | 5.0 M KOH        | 0.5 A $\text{g}^{-1}$                   | S7               |
| Nanoflakes                       |               | 107.5                                           | 137.7                                      | 2.0 M KOH        | 0.2 A $\text{g}^{-1}$                   | S8               |
| Nanocolumns                      |               | 102.4                                           | 390                                        | 1.0 M KOH        | 5 A $\text{g}^{-1}$                     | S9               |
| Nanoflakes                       |               | --                                              | 401                                        | 2.0 M KOH        | 0.5 mA $\text{cm}^{-2}$                 | S10              |
| Nanoflower                       |               | 159                                             | 480                                        | 2.0 M KOH        | 0.5 A $\text{g}^{-1}$                   | S11              |
| Hollow nanospheres               |               | 92.99                                           | 612.5                                      | 2.0 M KOH        | 0.5 A $\text{g}^{-1}$                   | S12              |
| Porous hollow spheres            |               | 85                                              | 346                                        | 2.0 M KOH        | 1 A $\text{g}^{-1}$                     | S13              |
| Hierarchical nanospheres         |               | 182                                             | 463                                        | 5.0 M KOH        | 4.5 A $\text{g}^{-1}$                   | S14              |
| Hexagonal nanoplates             |               | 95                                              | 286.7                                      | 6.0 M KOH        | 1.0 A $\text{g}^{-1}$                   | S15              |
| Hollow nanofibers                |               | 212.1                                           | 336                                        | 6.0 M KOH        | 5 mA $\text{cm}^{-2}$                   | S16              |
| NiO/Ni nanocomposites            |               | 37                                              | 905                                        | 1.0 M KOH        | 1.0 A $\text{g}^{-1}$                   | S17              |
| NiO/mesoporous carbons           |               | 802                                             | 880.2                                      | 6.0 M KOH        | 1.0 A $\text{g}^{-1}$                   | S18              |
| Carbon-coated                    | mesoporous    | 107.6                                           | 931                                        | 1.0 M KOH        | 2.0 A $\text{g}^{-1}$                   | S19              |
| NiO nanoparticles                |               |                                                 |                                            |                  |                                         |                  |
| Amorphous                        | carbon-coated | 144                                             | 288                                        | 1.0 M KOH        | 0.3 A $\text{g}^{-1}$                   | S20              |
| NiO nanofibers                   |               |                                                 |                                            |                  |                                         |                  |
| <b>NiO mesocrystals (NOM-20)</b> |               | <b>197.5</b>                                    | <b>1039</b>                                | <b>2.0 M KOH</b> | <b>1.0 A <math>\text{g}^{-1}</math></b> | <b>This work</b> |

## References

(S1) Zhao, X.; Dong, H.; Xiao, Y.; Hu, H.; Cai, Y.; Liang, Y.; Sun, L.; Liu, Y.; Zheng, M. Three-Dimensional Nitrogen-Doped Graphene as Binder-Free Electrode Materials for Supercapacitors with High Volumetric Capacitance and the Synergistic Effect Between Nitrogen Configuration and Supercapacitive Performance. *Electrochim. Acta* **2016**, *218*, 32–40.

(S2) Singh, A. K.; Sarkar, D.; Khan, G. G.; Mandal, K. Unique Hydrogenated Ni/NiO coreshell 1D Nano-Heterostructures with Superior Electrochemical Performance as Supercapacitors. *J. Mater. Chem. A* **2013**, *1*, 12759–12767.

(S3) Zhang, G.; Yu, L.; Hoster, H. E.; Lou, X. W. Synthesis of One-Dimensional Hierarchical NiO Hollow Nanostructures with Enhanced Supercapacitive Performance. *Nanoscale* **2013**, *5*, 877–881.

(S4) Yuan, C. Template-Free Synthesis of Ultrathin Mesoporous NiO Nanosheets and Their Application in Supercapacitors. *Mater. Res. Bull.* **2013**, *48*, 840–843.

(S5) Liu, M.; Chang, J.; Sun, J.; Gao, L. Synthesis of Porous NiO Using NaBH<sub>4</sub> Dissolved in Ethylene Glycol as Precipitant for High-Performance Supercapacitor. *Electrochim. Acta* **2013**, *107*, 9–15.

(S6) Wang, H.; Wang, Y.; Wang, X. Pulsed Laser Deposition of the Porous Nickel Oxide Thin Film at Room Temperature for High-Rate Pseudocapacitive Energy Storage. *Electrochem. Commun.* **2012**, *18*, 92–95.

(S7) Han, D.; Xu, P.; Jing, X.; Wang, J.; Song, D.; Liu, J.; Zhang, M. Facile Approach to Prepare Hollow Core-shell NiO Microspheres for Supercapacitor Electrodes. *J. Solid State Chem.* **2013**, *203*, 60–67.

(S8) Zheng, Y. Z.; Ding, H. Y.; Zhang, M. L. Preparation and Electrochemical Properties of Nickel Oxide as a Supercapacitor Electrode Material. *Mater. Res. Bull.* **2009**, *44*, 403–407.

(S9) Zhang, X.; Shi, W.; Zhu, J.; Zhao, W.; Ma, J.; Mhaisalkar, S.; Maria, T. L.; Yang, Y.; Zhang, H.; Hng, H. H.; Yan, Q. Synthesis of Porous NiO Nanocrystals with Controllable Surface Area and Their

Application as Supercapacitor Electrodes. *Nano Res.* **2010**, *3*, 643–652.

(S10) Vijayakumar, S.; Nagamuthu, S.; Muralidharan, G. Supercapacitor Studies on NiO Nanoflakes Synthesized Through a Microwave Route. *ACS Appl. Mater. Interfaces* **2013**, *5*, 2188–2196.

(S11) Kim, S. I.; Lee, J. S.; Ahn, H. J.; Song, H. K.; Jang, J. H. Facile Route to an Efficient NiO Supercapacitor with a Three-Dimensional Nanonetwork Morphology. *ACS Appl. Mater. Interfaces* **2013**, *5*, 1596–1603.

(12) Yang, Z.; Xu, F.; Zhang, W.; Mei, Z.; Pei, B.; Zhu, X. Controllable Preparation of Multishelled NiO Hollow Nanospheres via Layer-by-Layer Self-Assembly for Supercapacitor Application. *J. Power Sources* **2014**, *246*, 24–31.

(S13) Yan, X.; Tong, X.; Wang, J.; Gong, C.; Zhang, M.; Liang, L. Rational Synthesis of Hierarchically Porous NiO Hollow Spheres and Their Supercapacitor Application. *Materials Letters* **2013**, *95*, 1–4.

(S14) Han, D.; Xu, P.; Jing, X.; Wang, J.; Yang, P.; Shen, Q.; Liu, J.; Song, D.; Gao, Z.; Zhang, M. Trisodium Citrate Assisted Synthesis of Hierarchical NiO Nanospheres with Improved Supercapacitor Performance. *J. Power Sources* **2013**, *235*, 45–53.

(S15) Zhu, Z.; Ping, J.; Huang, X.; Hu, J.; Chen, Q.; Ji, X.; Banks, C. E. Hexagonal Nickel Oxide Nanoplate-Based Electrochemical Supercapacitor. *J. Mater. Sci.* **2012**, *47*, 503–507.

(S16) Ren, B.; Fan, M.; Liu, Q.; Wang, J.; Song, D.; Bai, X. Hollow NiO Nanofibers Modified by Citric Acid and the Performances as Supercapacitor Electrode. *Electrochim. Acta* **2013**, *92*, 197–204.

(S17) Lu, Q.; Lattanzi, M. W.; Chen, Y.; Kou, X.; Li, W.; Fan, X.; Unruh, K. M.; Chen, J. G.; Xiao, J. Q. Supercapacitor Electrodes with High-Energy and Power Densities Prepared from Monolithic NiO/Ni Nanocomposites. *Angew. Chem. Int. Ed.* **2011**, *50*, 6847–6850.

(S18) Chen, F.; Zhou, W.; Yao, H.; Fan, P.; Yang, J.; Fei, Z.; Zhong, M. Self-Assembly of NiO Nanoparticles in Lignin-Derived Mesoporous Carbons for Supercapacitor Applications. *Green Chem.*

**2013**, *15*, 3057–3063.

(S19) Xu, K.; Zou, R.; Li, W.; Liu, Q.; Wang, T.; Yang, J.; Chen, Z.; Hu, J. Carbon-Coated Mesoporous NiO Nanoparticles as an Electrode Material for High Performance Electrochemical Capacitors. *New J. Chem.* **2013**, *37*, 4031–4036.

(S20) Shin, D. H.; Lee, J. S.; Jun, J.; Jang, J. Fabrication of Amorphous Carbon-Coated NiO Nanofibers for Electrochemical Capacitor Applications. *J. Mater. Chem. A* **2014**, *2*, 3364–3371.
